# Supplementary material for: Variation in Melatonin Contents and Genetic Dissection of Melatonin Biosynthesis in Sesame
Source: MDPI journal article supplement (doi:10.3390/plants11152005), 2022-07-31
Supplement: s1 [file s1]

## **Supplementary Materials**

Figure S1. Optimization of sample pretreatment conditions (A) the extraction efficiency of Methanol (MeoH) and Acetonitrile (ACN)); (B) Effect of extraction solvent MeoH volume; (C) the recovery of PSA and C18; (D) Effect of quantity of C<sub>18</sub>

Figure S2. Extraction ion chromatograms of melatonin

Figure S3. The expressional levels of potential candidate genes associated with melatonin content in sesame seed at different stage of development. Heat maps were constructed based on the log<sub>10</sub>-transformed RPKM values for each gene. The color scale for expression values is shown. DAF: days after flowering

Figure S4. Expression of SiWRKY67 in SiWRKY67-overexpressing transgenic hairy root lines. Error bars indicate SE based on three replicates. VC: empty vector control

Table S1. The list of 450 accessions sampled in the collection

Figure S1. Optimization of sample pretreatment conditions (A) the extraction efficiency of Methanol (MeoH) and Acetonitrile (ACN)); (B) Effect of extraction solvent MeoH volume; (C) the recovery of PSA and C<sub>18</sub>; (D) Effect of quantity of C<sub>18</sub>

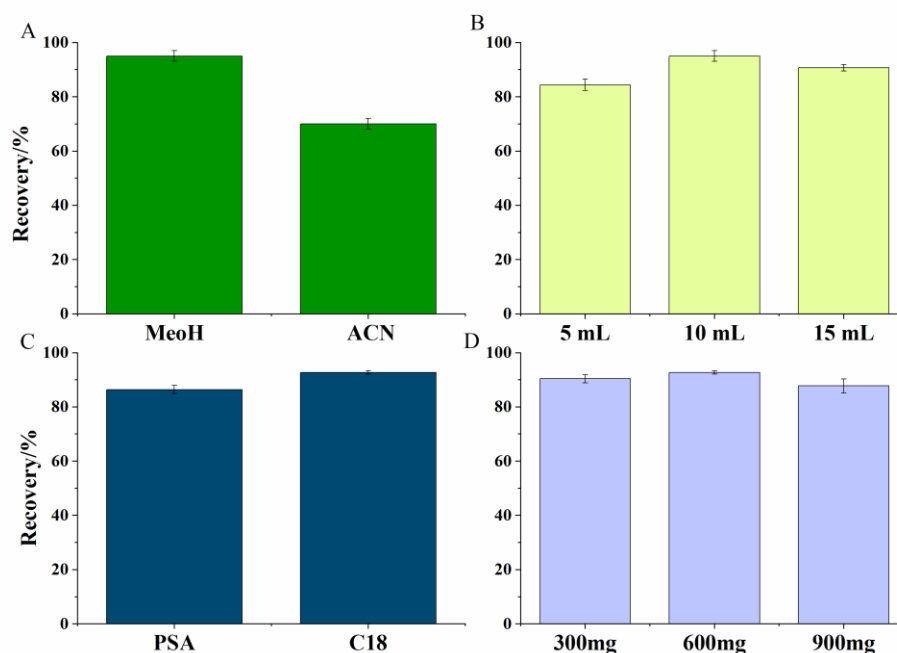

Figure S2. Extraction ion chromatograms of melatonin (A) and fragmentation pathways of melatonin (B)

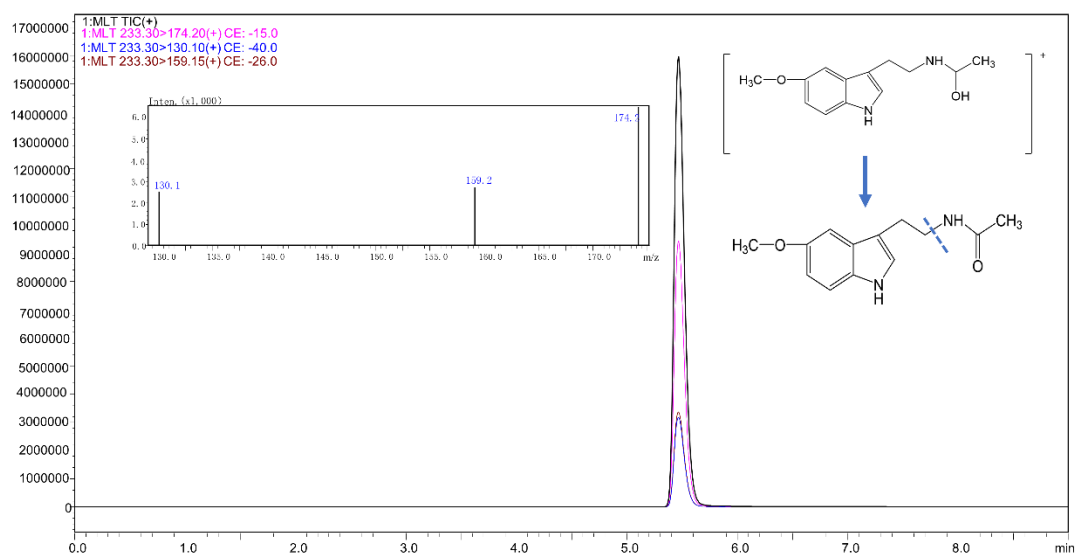

Figure S3. The expressional levels of potential candidate genes associated with melatonin content in sesame seed at different stage of development. Heat maps were constructed based on the log<sub>10</sub>-transformed RPKM values for each gene. The color scale for expression values is shown. DAF: days after flowering.

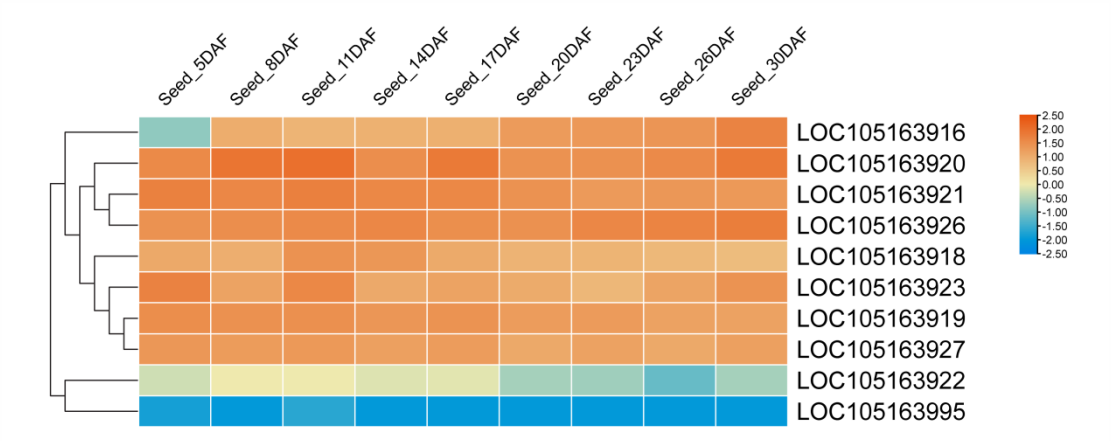

Figure S4. Expression of *SiWRKY67* in *SiWRKY67*-overexpressing transgenic hairy root lines. Error bars indicate SE based on three replicates. VC: empty vector control

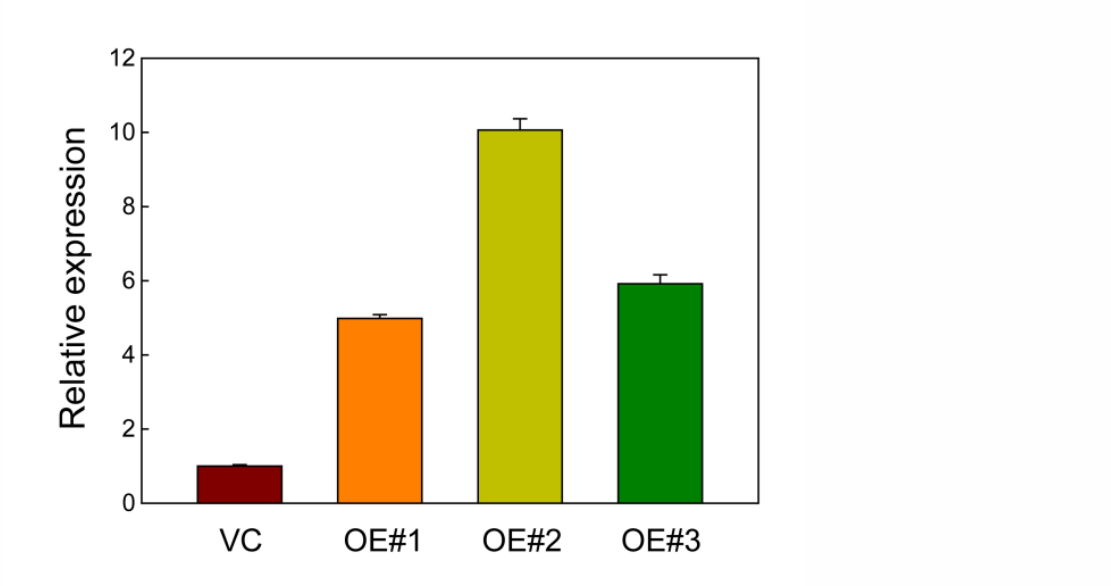

Table S1. The list of 450 accessions sampled in the collection

| Accession ID | Accession name | Original producing<br>area | Longitude(°) | Latitude(°) | Type            | Grouping in neighbor-joining tree |
|--------------|----------------|----------------------------|--------------|-------------|-----------------|-----------------------------------|
| G002         | Zhima          | China                      | 116.33E      | 39.73N      | Landrace        | Southern-area group               |
| G005         | Zhima          | China                      | 116.58E      | 35.41N      | Landrace        | Northern-area group               |
| G006         | Xinbianwuhao   | China                      | 118.35E      | 35.19N      | Landrace        | Northern-area group               |
| G007         | Bagucha        | China                      | 115.09E      | 35.30N      | Landrace        | Northern-area group               |
| G009         | Heshangmao     | China                      | 116.30E      | 35.07N      | Landrace        | Northern-area group               |
| G010         | Baiyinzhima    | China                      | 121.38E      | 37.54N      | Landrace        | Northern-area group               |
| G011         | Zhuzhi1        | China                      | NA           | NA          | Modern cultivar | Southern-area group               |
| G013         | Huangzhima     | China                      | 113.82E      | 34.03N      | Landrace        | Northern-area group               |
| G014         | Badacha        | China                      | 113.06E      | 33.87N      | Landrace        | Northern-area group               |
| G015         | Heizhima       | China                      | 114.86E      | 31.63N      | Landrace        | Southern-area group               |
| G016         | Baizhima       | China                      | 114.86E      | 34.06N      | Landrace        | Northern-area group               |
| G017         | Baicao         | China                      | 114.90E      | 33.44N      | Landrace        | Northern-area group               |
| G019         | Xiaozihuang    | China                      | 113.99E      | 33.15N      | Landrace        | Southern-area group               |
| G020         | Waizuihong     | China                      | 114.73E      | 32.34N      | Landrace        | Northern-area group               |
| G024         | Baizhima       | China                      | 118.58E      | 30.08N      | Landrace        | Southern-area group               |
| G025         | Zhima          | China                      | 118.43E      | 32.45N      | Landrace        | Northern-area group               |
| G026         | Guanyinma      | China                      | 114.11E      | 31.56N      | Landrace        | Northern-area group               |
| G027         | Baizhima       | China                      | 112.14E      | 32.05N      | Landrace        | Southern-area group               |
| G028         | Duijiaozhima   | China                      | 114.32E      | 30.35N      | Landrace        | Southern-area group               |
| G029         | 786            | China                      | NA           | NA          | Modern cultivar | Southern-area group               |
| G030         | Wujiaozhan     | China                      | 113.37E      | 31.72N      | Landrace        | Southern-area group               |
| G032         | Zhongzhi5hao   | China                      | 114.33E      | 30.35N      | Landrace        | Southern-area group               |
| G033         | Zhima          | China                      | 114.11E      | 31.56N      | Landrace        | Southern-area group               |

|      |               |       |         |        |          |                     |
|------|---------------|-------|---------|--------|----------|---------------------|
| G034 | Hongyangzhima | China | 112.14E | 32.05N | Landrace | Northern-area group |
| G035 | Dikehuang     | China | 112.76E | 32.13N | Landrace | Southern-area group |
| G036 | Tanma         | China | 113.69E | 31.26N | Landrace | Southern-area group |
| G043 | Zhima         | China | 121.43E | 29.28N | Landrace | Northern-area group |
| G045 | Zhima         | China | 83.62E  | 46.52N | Landrace | Northern-area group |
| G047 | Zhima         | China | 89.18E  | 42.94N | Landrace | Northern-area group |
| G048 | Zhima         | China | 89.18E  | 42.94N | Landrace | Northern-area group |
| G049 | Zhima         | China | 89.18E  | 42.94N | Landrace | Northern-area group |
| G051 | Balengzhima   | China | 111.75E | 37.27N | Landrace | Northern-area group |
| G053 | Zhima         | China | 112.02E | 37.44N | Landrace | Northern-area group |
| G054 | Zhima         | China | 112.84E | 35.51N | Landrace | Northern-area group |
| G055 | Hezhima       | China | 111.08E | 39.01N | Landrace | Southern-area group |
| G056 | Baizhima      | China | 109.94E | 34.80N | Landrace | Southern-area group |
| G057 | Baizhima      | China | 110.15E | 35.24N | Landrace | Southern-area group |
| G058 | Zhima         | China | 108.24E | 34.53N | Landrace | Southern-area group |
| G059 | Zhima         | China | 108.25E | 33.04N | Landrace | Northern-area group |
| G060 | Yeyesan       | China | 109.03E | 32.69N | Landrace | Northern-area group |
| G061 | Zhima         | China | 109.43E | 35.76N | Landrace | Southern-area group |
| G062 | Zhima         | China | 110.87E | 33.53N | Landrace | Southern-area group |
| G063 | Xizhima       | China | 108.24E | 34.53N | Landrace | Northern-area group |
| G064 | Zhima         | China | 108.32E | 33.32N | Landrace | Northern-area group |
| G065 | Yizhima       | China | 109.59E | 35.18N | Landrace | Northern-area group |
| G066 | Baizhima      | China | 107.38E | 34.35N | Landrace | Southern-area group |
| G067 | Wucuolian     | China | 108.48E | 34.30N | Landrace | Southern-area group |
| G069 | Heizhima      | China | 117.93E | 35.71N | Landrace | Northern-area group |
| G070 | Henanyihao    | China | 113.66E | 34.77N | Landrace | Southern-area group |

|      |                |       |         |        |                 |                     |
|------|----------------|-------|---------|--------|-----------------|---------------------|
| G071 | Huangzhima     | China | 118.41E | 30.69N | Landrace        | Southern-area group |
| G072 | Zhima          | China | 115.86E | 31.69N | Landrace        | Southern-area group |
| G076 | Hezhima        | China | 109.89E | 31.08N | Landrace        | Southern-area group |
| G077 | Heizhima       | China | 105.38E | 31.23N | Landrace        | Southern-area group |
| G078 | Zhuanzhulian-1 | China | 113.37E | 31.72N | Landrace        | Southern-area group |
| G079 | Zhongzhi8      | China | NA      | NA     | Modern cultivar | Southern-area group |
| G080 | Sifangzhima    | China | 113.81E | 29.26N | Landrace        | Southern-area group |
| G082 | Huoma          | China | 113.82E | 31.62N | Landrace        | Northern-area group |
| G083 | Jinkouheizhima | China | 120.75E | 30.77N | Landrace        | Southern-area group |
| G085 | Mishuozhima    | China | 120.23E | 29.26N | Landrace        | Southern-area group |
| G087 | Yingsangu      | China | 120.39E | 27.51N | Landrace        | Southern-area group |
| G088 | Baizhima       | China | 120.96E | 28.13N | Landrace        | Southern-area group |
| G089 | Zhima          | China | 117.58E | 28.95N | Landrace        | Southern-area group |
| G091 | Zhima          | China | 115.89E | 29.61N | Landrace        | Southern-area group |
| G092 | Zhima          | China | NA      | NA     | Landrace        | Southern-area group |
| G098 | Baizhima       | China | 116.77E | 23.46N | Landrace        | Southern-area group |
| G102 | Baizhima       | China | 114.27E | 23.17N | Landrace        | Southern-area group |
| G104 | Zhima          | China | 123.34E | 42.75N | Landrace        | Northern-area group |
| G107 | Zhima          | China | 122.45E | 42.31N | Landrace        | Northern-area group |
| G110 | Bawangbian     | China | 119.90E | 42.28N | Landrace        | Northern-area group |
| G111 | Jiaopanzhima   | China | 111.78E | 37.14N | Landrace        | Northern-area group |
| G116 | Baizhima       | China | 109.15E | 33.43N | Landrace        | Northern-area group |
| G117 | Hongzhima      | China | 109.94E | 34.80N | Landrace        | Southern-area group |
| G118 | Huangzhima     | China | 110.87E | 33.53N | Landrace        | Northern-area group |
| G119 | Heizhima       | China | 119.17E | 34.61N | Landrace        | Southern-area group |
| G120 | Huangzhima     | China | 116.27E | 30.42N | Landrace        | Southern-area group |

|      |                 |       |         |        |          |                     |
|------|-----------------|-------|---------|--------|----------|---------------------|
| G121 | Zhima           | China | 116.11E | 30.15N | Landrace | Southern-area group |
| G122 | Muzhenbai       | China | 117.86E | 30.64N | Landrace | Northern-area group |
| G123 | Zhufangzhima    | China | 115.86E | 31.69N | Landrace | Southern-area group |
| G125 | Zhangdianbai    | China | 116.49E | 31.75N | Landrace | Southern-area group |
| G126 | Dushanhei       | China | 119.42E | 30.89N | Landrace | Southern-area group |
| G127 | Zhima           | China | 116.97E | 33.64N | Landrace | Southern-area group |
| G129 | Heizhima        | China | 109.62E | 31.41N | Landrace | Southern-area group |
| G131 | Wuyahei         | China | 109.62E | 31.41N | Landrace | Southern-area group |
| G132 | Duozhima        | China | 108.89E | 30.97N | Landrace | Southern-area group |
| G134 | Zhima           | China | 109.71E | 32.33N | Landrace | Southern-area group |
| G135 | Mazhima         | China | 110.76E | 31.24N | Landrace | Southern-area group |
| G136 | Mazhima         | China | 110.73E | 32.06N | Landrace | Northern-area group |
| G137 | Hezhima         | China | 110.76E | 31.24N | Landrace | Southern-area group |
| G139 | Liujiaobaizhima | China | 121.37E | 31.11N | Landrace | Southern-area group |
| G142 | Zichangma       | China | 117.90E | 28.43N | Landrace | Southern-area group |
| G143 | Haihuiheizhima  | China | 115.89E | 29.61N | Landrace | Southern-area group |
| G144 | Zihuahei        | China | 115.10E | 29.26N | Landrace | Southern-area group |
| G146 | Wenzhubaizhima  | China | 114.78E | 26.46N | Landrace | Southern-area group |
| G147 | Zhima           | China | 109.85E | 29.01N | Landrace | Southern-area group |
| G148 | Zhima           | China | 106.82E | 27.54N | Landrace | Southern-area group |
| G150 | Baizhima        | China | 119.30E | 26.08N | Landrace | Southern-area group |
| G151 | Zhima           | China | NA      | NA     | Landrace | Southern-area group |
| G152 | Zhima           | China | NA      | NA     | Landrace | Southern-area group |
| G153 | Bachazhima      | China | 101.99E | 24.08N | Landrace | Southern-area group |
| G154 | Baizhima        | China | 105.33E | 24.78N | Landrace | Southern-area group |
| G160 | Baizhima        | China | 110.19E | 20.1N  | Landrace | Southern-area group |

|      |                      |       |         |        |          |                     |
|------|----------------------|-------|---------|--------|----------|---------------------|
| G163 | Tainanheixuanlhao    | China | 120.31E | 23.31N | Landrace | Southern-area group |
| G164 | Heizhima             | China | 114.88E | 33.73N | Landrace | Southern-area group |
| G165 | Sangenqiang          | China | 114.88E | 33.73N | Landrace | Northern-area group |
| G166 | Yibabian             | China | 113.66E | 35.27N | Landrace | Northern-area group |
| G167 | Zhima                | China | 113.81E | 36.07N | Landrace | Southern-area group |
| G168 | Youhulu              | China | 113.32E | 32.72N | Landrace | Northern-area group |
| G170 | Waizuibai            | China | 114.77E | 34.55N | Landrace | Northern-area group |
| G171 | Baizhima             | China | 114.26E | 33.27N | Landrace | Northern-area group |
| G172 | Liutiaoqing          | China | 114.52E | 33.79N | Landrace | Northern-area group |
| G173 | Erlanghuazhima       | China | 114.02E | 33.39N | Landrace | Northern-area group |
| G174 | Baizhima             | China | 112.36E | 32.52N | Landrace | Northern-area group |
| G175 | Yiyesan              | China | 112.36E | 32.52N | Landrace | Northern-area group |
| G177 | Baizhima             | China | 106.93E | 33.00N | Landrace | Northern-area group |
| G178 | Bantangzhima         | China | 117.86E | 31.60N | Landrace | Southern-area group |
| G179 | Baizhima             | China | 118.48E | 31.56N | Landrace | Southern-area group |
| G180 | Heizhima             | China | 117.47E | 31.89N | Landrace | Southern-area group |
| G181 | Youzhima             | China | 117.16E | 31.72N | Landrace | Southern-area group |
| G182 | Jiugugangcha         | China | 117.55E | 32.86N | Landrace | Northern-area group |
| G183 | Bawangbian           | China | 116.26E | 32.34N | Landrace | Southern-area group |
| G184 | Huangzhima           | China | 118.33E | 30.92N | Landrace | Southern-area group |
| G185 | Ningguohuangzhima    | China | 118.98E | 30.62N | Landrace | Southern-area group |
| G187 | Zhima                | China | 118.26E | 32.10N | Landrace | Northern-area group |
| G188 | Dayanhei             | China | 117.47E | 30.21N | Landrace | Southern-area group |
| G190 | Huangchizhima        | China | 118.57E | 31.15N | Landrace | Southern-area group |
| G191 | Youzhima             | China | 118.43E | 29.87N | Landrace | Southern-area group |
| G192 | Yingshangzhimaliuhao | China | 116.25E | 32.64N | Landrace | Southern-area group |



|      |              |       |         |        |          |                     |
|------|--------------|-------|---------|--------|----------|---------------------|
| G194 | Tieqingzhima | China | 110.11E | 32.81N | Landrace | Northern-area group |
| G195 | Huazhima     | China | 110.33E | 33.69N | Landrace | Southern-area group |
| G196 | Zhima        | China | 109.08E | 34.53N | Landrace | Northern-area group |
| G197 | Zhima        | China | 109.29E | 37.96N | Landrace | Northern-area group |
| G198 | Zhima        | China | 114.52E | 33.79N | Landrace | Northern-area group |
| G199 | Zhima        | China | 110.50E | 38.02N | Landrace | Northern-area group |
| G201 | Zhima        | China | 106.85E | 34.89N | Landrace | Southern-area group |
| G202 | Hongzhima    | China | 106.16E | 33.33N | Landrace | Southern-area group |
| G204 | Baizhima     | China | 114.02E | 33.39N | Landrace | Northern-area group |
| G205 | Heizhima     | China | 110.01E | 36.58N | Landrace | Northern-area group |
| G206 | Heizhima     | China | 108.97E | 34.91N | Landrace | Southern-area group |
| G207 | Zhima        | China | 109.52E | 31.05N | Landrace | Southern-area group |
| G208 | Baizhima     | China | 108.42E | 31.19N | Landrace | Southern-area group |
| G209 | Xiaoheizi    | China | 108.35E | 30.84N | Landrace | Southern-area group |
| G210 | Zhuanjiaolou | China | 105.38E | 31.23N | Landrace | Southern-area group |
| G211 | Baihuama     | China | 108.89E | 30.97N | Landrace | Southern-area group |
| G212 | Zhima        | China | 110.40E | 31.03N | Landrace | Northern-area group |
| G213 | Xiniujiang   | China | 111.65E | 32.27N | Landrace | Southern-area group |
| G214 | Yangzhima    | China | 111.68E | 32.39N | Landrace | Southern-area group |
| G215 | Zhuganqing   | China | 114.37E | 30.88N | Landrace | Northern-area group |
| G216 | Yesanjiao    | China | 113.90E | 29.98N | Landrace | Southern-area group |
| G217 | Zhima        | China | 112.19E | 30.35N | Landrace | Northern-area group |
| G218 | Silunzi      | China | 112.20E | 31.03N | Landrace | Southern-area group |
| G219 | Qiezhima     | China | 115.39E | 30.79N | Landrace | Southern-area group |
| G221 | Zhima        | China | 112.20E | 31.03N | Landrace | Southern-area group |
| G222 | Fazhima      | China | 113.16E | 30.66N | Landrace | Southern-area group |

|      |                  |       |         |        |          |                     |
|------|------------------|-------|---------|--------|----------|---------------------|
| G223 | Baizhima         | China | 110.68E | 30.20N | Landrace | Southern-area group |
| G224 | Fupima           | China | 113.91E | 30.93N | Landrace | Southern-area group |
| G228 | Huangzhima11hao  | China | 112.59E | 31.17N | Landrace | Southern-area group |
| G229 | Baizhima         | China | 110.69E | 31.00N | Landrace | Southern-area group |
| G231 | Zhima            | China | 113.11E | 29.14N | Landrace | Southern-area group |
| G232 | Baizhima         | China | 116.66E | 28.99N | Landrace | Southern-area group |
| G233 | Qiancengta       | China | 116.66E | 28.99N | Landrace | Southern-area group |
| G236 | Duolengzhima     | China | 117.20E | 28.29N | Landrace | Southern-area group |
| G238 | Duoshuoguoazhima | China | 115.89E | 29.61N | Landrace | Southern-area group |
| G239 | Dayanghuangzhima | China | 116.30E | 27.93N | Landrace | Northern-area group |
| G243 | Heizhima         | China | 117.90E | 28.43N | Landrace | Southern-area group |
| G244 | Qiuheimaxuan3    | China | 117.90E | 28.43N | Landrace | Southern-area group |
| G246 | Heizhima         | China | 115.10E | 29.26N | Landrace | Southern-area group |
| G250 | Zhima            | China | 116.86E | 38.31N | Landrace | Northern-area group |
| G251 | Xinshengyihao    | China | 116.65E | 36.95N | Landrace | Northern-area group |
| G252 | Dabacha          | China | 119.40E | 35.99N | Landrace | Southern-area group |
| G254 | Daqingjie        | China | 118.54E | 36.51N | Landrace | Northern-area group |
| G255 | Yitiaobian       | China | 118.34E | 35.07N | Landrace | Northern-area group |
| G256 | Zhima            | China | 117.52E | 36.71N | Landrace | Northern-area group |
| G258 | Lvjingzhima      | China | 123.18E | 47.34N | Landrace | Northern-area group |
| G262 | Baizhima         | China | 82.99E  | 46.75N | Landrace | Northern-area group |
| G263 | Batongzhima      | China | 116.09E | 38.71N | Landrace | Northern-area group |
| G265 | Baizhima         | China | 112.92E | 35.79N | Landrace | Northern-area group |
| G266 | Fenchazhima      | China | 111.22E | 35.14N | Landrace | Northern-area group |
| G267 | Zhima            | China | 113.04E | 36.53N | Landrace | Northern-area group |
| G268 | Fenchazhima      | China | 111.47E | 35.64N | Landrace | Northern-area group |

|      |                  |       |         |        |          |                     |
|------|------------------|-------|---------|--------|----------|---------------------|
| G269 | Heizhima         | China | 112.34E | 37.61N | Landrace | Northern-area group |
| G270 | Datoubang        | China | 121.41E | 29.65N | Landrace | Southern-area group |
| G271 | Liutiaoqing      | China | 120.43E | 29.05N | Landrace | Southern-area group |
| G274 | Baizhima         | China | 108.74E | 27.22N | Landrace | Southern-area group |
| G275 | Baizhima         | China | 105.18E | 25.44N | Landrace | Southern-area group |
| G276 | Baizhima         | China | 108.49E | 22.75N | Landrace | Southern-area group |
| G277 | Baizhima         | China | 109.23E | 23.73N | Landrace | Southern-area group |
| G278 | Shangningaizhima | China | 108.66E | 24.06N | Landrace | Southern-area group |
| G283 | Liusuozhima      | China | 119.49E | 28.45N | Landrace | Northern-area group |
| G286 | Zhima            | China | 106.82E | 28.14N | Landrace | Southern-area group |
| G287 | Baizhima         | China | 108.84E | 27.69N | Landrace | Southern-area group |
| G288 | Heizhima         | China | 107.88E | 25.41N | Landrace | Southern-area group |
| G289 | Baizhima         | China | 117.61E | 24.12N | Landrace | Southern-area group |
| G292 | Baizhima         | China | 107.98E | 22.15N | Landrace | Southern-area group |
| G293 | Heizhima         | China | 111.27E | 24.82N | Landrace | Southern-area group |
| G297 | Zhima            | China | 121.79E | 41.60N | Landrace | Northern-area group |
| G298 | Zhima            | China | 120.33E | 40.33N | Landrace | Northern-area group |
| G300 | Bawangbian       | China | 117.06E | 39.38N | Landrace | Northern-area group |
| G301 | Dengmingsizhima  | China | 116.53E | 37.88N | Landrace | Northern-area group |
| G302 | Zihuazhima       | China | 114.83E | 38.04N | Landrace | Northern-area group |
| G303 | Sangucha         | China | 114.95E | 36.78N | Landrace | Northern-area group |
| G304 | Xiaobacha        | China | 115.97E | 37.34N | Landrace | Northern-area group |
| G305 | Zhima            | China | 115.02E | 37.21N | Landrace | Northern-area group |
| G306 | Wenrenheizhima   | China | 115.48E | 38.76N | Landrace | Northern-area group |
| G307 | Laohongzhima     | China | 111.48E | 33.14N | Landrace | Northern-area group |
| G308 | Baizhima         | China | 112.58E | 35.09N | Landrace | Northern-area group |

|      |                        |       |         |        |          |                     |
|------|------------------------|-------|---------|--------|----------|---------------------|
| G309 | Yeersan                | China | 114.63E | 32.96N | Landrace | Northern-area group |
| G323 | Zhima                  | China | 90.21E  | 42.86N | Landrace | Northern-area group |
| G325 | Zhima                  | China | 86.56E  | 42.06N | Landrace | Northern-area group |
| G327 | Zhima                  | China | 75.86E  | 39.38N | Landrace | Northern-area group |
| G328 | Longshanzhima          | China | 118.77E | 32.05N | Landrace | Southern-area group |
| G329 | Chama                  | China | 117.19E | 34.27N | Landrace | Northern-area group |
| G330 | Deleilei               | China | 119.42E | 32.39N | Landrace | Northern-area group |
| G332 | Zhima                  | China | 95.26E  | 25.22N | Landrace | Southern-area group |
| G333 | Aijiaojinhuangma       | China | 116.26E | 28.36N | Landrace | Southern-area group |
| G334 | Baizhima               | China | 105.22E | 25.83N | Landrace | Northern-area group |
| G336 | Luorongchuanma         | China | 109.74E | 24.49N | Landrace | Southern-area group |
| G337 | Chengxiangheizhima     | China | 107.91E | 22.64N | Landrace | Southern-area group |
| G338 | Heizhima               | China | 110.25E | 21.38N | Landrace | Southern-area group |
| G339 | Silengzhima            | China | 115.89E | 24.57N | Landrace | Southern-area group |
| G340 | Baizhima               | China | 110.32E | 19.70N | Landrace | Southern-area group |
| G341 | Hanguangchanshensileng | China | 113.40E | 24.17N | Landrace | Southern-area group |
| G345 | Xinyangbaizhima        | China | 120.26E | 33.77N | Landrace | Northern-area group |
| G346 | Baizhima               | China | 120.14E | 33.39N | Landrace | Southern-area group |
| G347 | Baizhima               | China | 119.57E | 31.75N | Landrace | Southern-area group |
| G348 | Heizhima               | China | 120.46E | 33.20N | Landrace | Southern-area group |
| G349 | Chama                  | China | 121.08E | 32.09N | Landrace | Southern-area group |
| G350 | Luanshanheizhima       | China | 113.34E | 27.00N | Landrace | Southern-area group |
| G351 | Heizhima               | China | 113.57E | 28.71N | Landrace | Southern-area group |
| G352 | Shuanghuzhima          | China | 111.12E | 29.43N | Landrace | Southern-area group |
| G353 | Zhima                  | China | 111.48E | 28.90N | Landrace | Southern-area group |
| G354 | Tianwanhongzhima       | China | 110.18E | 28.02N | Landrace | Southern-area group |

|      |               |       |         |        |          |                     |
|------|---------------|-------|---------|--------|----------|---------------------|
| G355 | Zhima         | China | 110.84E | 26.43N | Landrace | Southern-area group |
| G356 | Hukouzhima    | China | 113.55E | 26.80N | Landrace | Southern-area group |
| G357 | Zhima         | China | 110.40E | 28.46N | Landrace | Southern-area group |
| G359 | Heizhima      | China | 118.14E | 24.74N | Landrace | Southern-area group |
| G360 | Heizhima      | China | 117.60E | 26.22N | Landrace | Southern-area group |
| G361 | Baizhima      | China | 119.99E | 26.88N | Landrace | Northern-area group |
| G362 | Baizhima      | China | 118.03E | 27.76N | Landrace | Northern-area group |
| G364 | Heizhima      | China | 117.33E | 27.54N | Landrace | Southern-area group |
| G366 | Zhima         | China | 101.54E | 25.03N | Landrace | Southern-area group |
| G368 | Zhima         | China | 100.56E | 25.48N | Landrace | Southern-area group |
| G370 | Baizhima      | China | 101.67E | 26.06N | Landrace | Southern-area group |
| G371 | Zhima(248hao) | China | 102.74E | 23.17N | Landrace | Southern-area group |
| G372 | Zhima         | China | 101.28E | 25.20N | Landrace | Southern-area group |
| G377 | Baizhima      | China | 107.25E | 31.93N | Landrace | Southern-area group |
| G378 | Mazhima       | China | 107.72E | 31.36N | Landrace | Southern-area group |
| G379 | Zhima         | China | 106.29E | 32.22N | Landrace | Southern-area group |
| G380 | Zhuanjiaolou  | China | 106.83E | 32.36N | Landrace | Southern-area group |
| G381 | Zhima         | China | 103.57E | 28.26N | Landrace | Southern-area group |
| G382 | Huangzhima    | China | 105.23E | 32.58N | Landrace | Southern-area group |
| G383 | Zhima         | China | 104.44E | 31.83N | Landrace | Southern-area group |
| G384 | Zhima         | China | 102.17E | 28.55N | Landrace | Southern-area group |
| G385 | Zhima         | China | 101.51E | 27.42N | Landrace | Southern-area group |
| G386 | Zhima         | China | 104.53E | 32.41N | Landrace | Southern-area group |
| G387 | Zhima         | China | 103.13E | 28.33N | Landrace | Southern-area group |
| G388 | Zhima         | China | 103.57E | 28.26N | Landrace | Southern-area group |
| G389 | Bendizhima    | China | 101.55E | 26.91N | Landrace | Southern-area group |

|      |                   |            |         |        |                 |                     |
|------|-------------------|------------|---------|--------|-----------------|---------------------|
| G390 | Heizhima          | China      | 105.83E | 32.44N | Landrace        | Southern-area group |
| G391 | Heizhima          | China      | 102.11E | 26.89N | Landrace        | Southern-area group |
| G392 | 99-2188           | China      | NA      | NA     | Modern cultivar | Southern-area group |
| G393 | Zhima             | China      | 122.07E | 46.06N | Landrace        | Southern-area group |
| G396 | Zhima             | China      | 121.55E | 45.38N | Landrace        | Northern-area group |
| G397 | Ezhi1hao          | China      | NA      | NA     | Modern cultivar | Southern-area group |
| G398 | Ezhi2hao          | China      | NA      | NA     | Modern cultivar | Southern-area group |
| G399 | Ezhi5hao          | China      | NA      | NA     | Modern cultivar | Southern-area group |
| G400 | Ezhi6hao          | China      | NA      | NA     | Modern cultivar | Southern-area group |
| G401 | Zhongfengzhiyihao | China      | NA      | NA     | Modern cultivar | Southern-area group |
| G402 | Zhongzhi10        | China      | NA      | NA     | Modern cultivar | Southern-area group |
| G403 | Zhongzhi11        | China      | NA      | NA     | Modern cultivar | Southern-area group |
| G404 | Zhongzhi16        | China      | NA      | NA     | Modern cultivar | Northern-area group |
| G405 | 98N09             | China      | NA      | NA     | Modern cultivar | Southern-area group |
| G406 | Shanzhi3hao       | China      | NA      | NA     | Modern cultivar | Southern-area group |
| G408 | Jinhuangma        | China      | 116.26E | 28.36N | Landrace        | Southern-area group |
| G409 | UCLA83            | Venezuela  | 69.52W  | 9.52N  | NA              | Southern-area group |
| G410 | VIR 80            | Uzbekistan | 69.13E  | 41.16N | NA              | Northern-area group |
| G411 | VIR 136           | Armenia    | 44.51E  | 40.11N | NA              | Northern-area group |
| G412 | VIR 145           | Armenia    | 44.51E  | 40.11N | NA              | Northern-area group |
| G413 | VIR 146           | America    | 97.44W  | 30.17N | NA              | Northern-area group |
| G414 | VIR 202           | Turkey     | 30.05E  | 37.12N | NA              | Southern-area group |
| G415 | VIR 207           | Turkey     | 30.05E  | 37.12N | NA              | Northern-area group |
| G417 | VIR 231           | Greece     | 23.25E  | 37.05N | NA              | Southern-area group |
| G418 | VIR 825           | Uzbekistan | 69.13E  | 41.16N | NA              | Northern-area group |
| G419 | VIR 896           | Uzbekistan | 69.13E  | 41.16N | NA              | Northern-area group |

|      |                   |              |         |        |    |                     |
|------|-------------------|--------------|---------|--------|----|---------------------|
| G420 | VIR 899           | Russia       | 39.26E  | 45.22N | NA | Southern-area group |
| G421 | VIR 908           | Turkmenistan | 58.38E  | 37.95N | NA | Northern-area group |
| G424 | VIR 1767          | Russia       | 39.26E  | 45.22N | NA | Northern-area group |
| G427 | ZM11-18           | Burma        | 96.09E  | 16.48N | NA | Southern-area group |
| G428 | Jinkouzhima       | Tanzania     | 37.51E  | 7.13S  | NA | Southern-area group |
| G429 | Tashigan122       | Uzbekistan   | 69.13E  | 41.16N | NA | Southern-area group |
| G432 | Heizhima          | Vietnam      | 103.53E | 21.57N | NA | Southern-area group |
| G436 | K1                | Guinea       | 13.40W  | 9.32N  | NA | Southern-area group |
| G437 | Heizhima          | Mexico       | 102.33W | 23.38N | NA | Northern-area group |
| G438 | Guba-3            | Cuba         | 82.23W  | 23.70N | NA | Southern-area group |
| G439 | 341(34)           | Japan        | 136.50E | 35.12N | NA | Northern-area group |
| G440 | 10(27)            | Japan        | 136.50E | 35.12N | NA | Northern-area group |
| G443 | 523(41)           | Japan        | 136.50E | 35.12N | NA | Northern-area group |
| G444 | Teras             | Mexico       | 99.55W  | 25.25N | NA | Southern-area group |
| G445 | TKV-334(22)       | Japan        | 136.50E | 35.12N | NA | Northern-area group |
| G446 | TKV-309(23)       | Japan        | 136.50E | 35.12N | NA | Northern-area group |
| G448 | 723(38)           | Japan        | 136.50E | 35.12N | NA | Northern-area group |
| G449 | U.C.R/82NO209shat | America      | 97.32W  | 35.29N | NA | Southern-area group |
| G450 | Margo short       | Mozambique   | 32.40E  | 25.11S | NA | Northern-area group |
| G452 | Oro short         | Mozambique   | 32.40E  | 25.11S | NA | Southern-area group |
| G454 | 384(7)            | Japan        | 136.50E | 35.12N | NA | Northern-area group |
| G456 | 342(5)            | Japan        | 136.50E | 35.12N | NA | Northern-area group |
| G458 | 725(39)           | Japan        | 136.50E | 35.12N | NA | Northern-area group |
| G459 | 301(3)            | Japan        | 136.50E | 35.12N | NA | Northern-area group |
| G460 | Oro tall          | Mozambique   | 32.40E  | 25.11S | NA | Southern-area group |
| G461 | Zirra             | Mozambique   | 32.35E  | 25.58S | NA | Northern-area group |

---

|      |                |             |         |        |    |                     |
|------|----------------|-------------|---------|--------|----|---------------------|
| G465 | Teras          | Mexico      | 99.55W  | 25.25N | NA | Northern-area group |
| G466 | Suke No.5      | Mozambique  | 32.35E  | 25.58S | NA | Northern-area group |
| G468 | Inamar         | Mozambique  | 32.35E  | 25.58S | NA | Southern-area group |
| G469 | Oro 9/71       | Mozambique  | 32.35E  | 25.58S | NA | Southern-area group |
| G475 | U.C.R/82NO16NS | America     | 86.37W  | 34.42N | NA | Southern-area group |
| G477 | U.C.R/82NO8NS  | America     | 97.44W  | 30.17N | NA | Southern-area group |
| G479 | Nian(Pungnyon) | South Korea | 125.48E | 35.38N | NA | Southern-area group |
| G481 | Danbai         | South Korea | 126.58E | 37.33N | NA | Southern-area group |
| G483 | Guangchan      | South Korea | 126.58E | 37.33N | NA | Southern-area group |
| G484 | Anchan         | South Korea | 126.58E | 37.33N | NA | Northern-area group |
| G486 | Rucheng        | South Korea | 127.34E | 36.05N | NA | Northern-area group |
| G488 | Jinback        | South Korea | 127.07E | 34.58N | NA | Northern-area group |
| G489 | Yeoju-1        | South Korea | 127.32E | 37.14N | NA | Southern-area group |
| G494 | NW1            | Thailand    | 99.29E  | 16.12N | NA | Southern-area group |
| G495 | His-173        | Philippines | 120.35E | 17.20N | NA | Southern-area group |
| G500 | GMS-1          | America     | 112.05W | 33.31N | NA | Southern-area group |
| G501 | Potepye        | Burma       | 96.06E  | 19.45N | NA | Southern-area group |
| G502 | Patiae-1       | Burma       | 96.50E  | 21.58N | NA | Southern-area group |
| G504 | 91-2191        | Israel      | 34.46E  | 32.04N | NA | Southern-area group |
| G505 | No.835-1       | Bangladesh  | 90.24E  | 23.42N | NA | Southern-area group |
| G507 | 91-2299        | Israel      | 34.46E  | 32.04N | NA | Southern-area group |
| G510 | 393-3Bo        | Thailand    | 101.01E | 15.53N | NA | Southern-area group |
| G512 | Magwe 719      | Burma       | 96.50E  | 21.58N | NA | Southern-area group |
| G514 | Maeshae        | Burma       | 95.39E  | 19.08N | NA | Southern-area group |
| G516 | Ses-11         | Bangladesh  | 90.24E  | 23.42N | NA | Southern-area group |
| G517 | No.016211      | Italy       | 12.29E  | 41.53N | NA | Northern-area group |



|      |              |                      |         |        |                 |                     |
|------|--------------|----------------------|---------|--------|-----------------|---------------------|
| G519 | METHILA      | India                | 79.19E  | 28.10N | NA              | Southern-area group |
| G520 | HNNAN-NI     | India                | 77.22E  | 24.34N | NA              | Southern-area group |
| G522 | SINYA DANA-3 | India                | 75.58E  | 21.06N | NA              | Southern-area group |
| G524 | Boder Racet  | Thailand             | 100.31E | 13.45N | NA              | Southern-area group |
| G527 | EC—343404    | India                | 77.32E  | 10.27N | NA              | Northern-area group |
| G528 | EC—342782    | India                | 79.07E  | 14.11N | NA              | Northern-area group |
| G531 | EC—355640    | India                | 87.31E  | 22.55N | NA              | Southern-area group |
| G532 | EC—355666    | India                | 84.02E  | 20.46N | NA              | Southern-area group |
| G534 | EC—350643    | India                | 76.20E  | 19.12N | NA              | Northern-area group |
| G535 | EC—357032    | India                | 76.13E  | 12.46N | NA              | Northern-area group |
| G538 | S.J          | Mexico               | 108.30W | 29.34N | NA              | Southern-area group |
| G539 | 68·544       | Nicaragua            | 86.15W  | 12.08N | NA              | Southern-area group |
| G540 | 726          | Afghanistan          | 69.10E  | 34.31N | NA              | Southern-area group |
| G542 | 68-546       | Nicaragua            | 86.15W  | 12.08N | NA              | Southern-area group |
| G551 | 1034         | Israel               | 34.46E  | 32.04N | NA              | Southern-area group |
| G556 | Zhima9       | Vietnam              | 105.51E | 21.02N | NA              | Southern-area group |
| G557 | Zhima1       | Vietnam              | 105.11E | 20.25N | NA              | Southern-area group |
| G558 | Zhima18      | Vietnam              | 106.41E | 17.12N | NA              | Southern-area group |
| G559 | Zhima21      | Vietnam              | 105.51E | 21.02N | NA              | Southern-area group |
| G561 | Me den       | America              | 112.05W | 33.31N | NA              | Southern-area group |
| G565 | Luozhi21     | China                | NA      | NA     | Modern cultivar | Southern-area group |
| G574 | Zhima101     | Vietnam              | 105.51E | 21.02N | NA              | Southern-area group |
| G577 | Zhima10      | Vietnam              | 106.11E | 20.32N | NA              | Southern-area group |
| G580 | Zhima40      | Vietnam              | 106.51E | 21.27N | NA              | Northern-area group |
| G583 | Ezhi7hao     | China                | NA      | NA     | Modern cultivar | Southern-area group |
| G590 | NA           | United Arab Emirates | 54.22E  | 24.28N | NA              | Southern-area group |

|      |                 |             |         |        |                 |                     |
|------|-----------------|-------------|---------|--------|-----------------|---------------------|
| G591 | K1              | Guinea      | 13.40W  | 9.32N  | NA              | Southern-area group |
| G592 | K1              | Guinea      | 13.40W  | 9.32N  | NA              | Southern-area group |
| G593 | K2              | Guinea      | 13.40W  | 9.32N  | NA              | Southern-area group |
| G594 | K2              | Guinea      | 13.40W  | 9.32N  | NA              | Southern-area group |
| G596 | Calinda         | America     | 112.05W | 33.31N | NA              | Northern-area group |
| G598 | Guba-1          | Cuba        | 82.23W  | 23.07N | NA              | Southern-area group |
| G599 | Guba-2          | Cuba        | 82.23W  | 23.07N | NA              | Southern-area group |
| G600 | Guba-3          | Cuba        | 82.23W  | 23.07N | NA              | Southern-area group |
| G601 | Guba-4          | Cuba        | 82.23W  | 23.07N | NA              | Southern-area group |
| G602 | VIR 741         | Uzbekistan  | 69.13E  | 41.16N | NA              | Northern-area group |
| G603 | Zhima(8131)     | China       | 117.90E | 28.43N | Landrace        | Southern-area group |
| G604 | Zhongzhi15hao   | China       | NA      | NA     | Modern cultivar | Southern-area group |
| G605 | Yiyangbai       | China       | 112.17E | 34.51N | Landrace        | Southern-area group |
| G606 | Zihuayeersan    | China       | 114.26E | 33.27N | Landrace        | Northern-area group |
| G611 | H98             | China       | 115.93E | 30.08N | Landrace        | Southern-area group |
| G613 | Zhima           | China       | 116.34E | 35.41N | Landrace        | Northern-area group |
| G616 | Jizhi1hao       | China       | NA      | NA     | Modern cultivar | Southern-area group |
| G617 | Zhima           | Vietnam     | 106.11E | 17.47N | NA              | Northern-area group |
| G619 | Shuiyuan117     | South Korea | 127.14E | 37.04N | NA              | Southern-area group |
| G620 | Xiangheizhi2078 | China       | NA      | NA     | Modern cultivar | Southern-area group |
| G621 | Silengcao       | China       | 115.81E | 32.90N | Landrace        | Southern-area group |
| G622 | Jinzhilhao      | China       | NA      | NA     | Modern cultivar | Northern-area group |
| G623 | 725             | Afghanistan | 69.10E  | 34.31N | NA              | Southern-area group |
| G629 | K1              | Guinea      | 13.40W  | 9.32N  | NA              | Southern-area group |
| G630 | Suke No.5       | Mozambique  | 32.35E  | 25.58S | NA              | Southern-area group |
| G632 | Baizhima        | China       | 110.23E | 32.23N | Landrace        | Southern-area group |

|      |              |       |         |        |                 |                     |
|------|--------------|-------|---------|--------|-----------------|---------------------|
| G633 | Zhongzhi12   | China | NA      | NA     | Modern cultivar | Southern-area group |
| G634 | Zhongzhi1hao | China | NA      | NA     | Modern cultivar | Southern-area group |
| G636 | Yuzhi4hao    | China | NA      | NA     | Modern cultivar | Southern-area group |
| G637 | Yuzhi8hao    | China | NA      | NA     | Modern cultivar | Southern-area group |
| G638 | Zhengzhi13   | China | NA      | NA     | Modern cultivar | Southern-area group |
| G639 | Zhengzhi14   | China | NA      | NA     | Modern cultivar | Southern-area group |
| G640 | Luozhi12     | China | NA      | NA     | Modern cultivar | Southern-area group |
| G641 | Luozhi16     | China | NA      | NA     | Modern cultivar | Southern-area group |
| G643 | Zhuzhi11     | China | NA      | NA     | Modern cultivar | Southern-area group |
| G644 | Zhuzhi18     | China | NA      | NA     | Modern cultivar | Southern-area group |
| G646 | Suxianzhima  | China | 116.58E | 33.37N | Landrace        | Northern-area group |
| G647 | Wanzhi1hao   | China | NA      | NA     | Modern cultivar | Southern-area group |
| G648 | Wanzhi2hao   | China | NA      | NA     | Modern cultivar | Southern-area group |
| G649 | Wucuoian     | China | 108.48E | 34.30N | Landrace        | Southern-area group |
| G650 | Jizhi2hao    | China | NA      | NA     | Modern cultivar | Northern-area group |
| G651 | Jizhi1hao    | China | NA      | NA     | Modern cultivar | Southern-area group |
| G652 | Jizhi2hao    | China | NA      | NA     | Modern cultivar | Southern-area group |
| G653 | Liaopinzhil  | China | NA      | NA     | Modern cultivar | Northern-area group |
| G654 | Liaopinzhil2 | China | NA      | NA     | Modern cultivar | Northern-area group |
| G656 | Ezhi4hao     | China | NA      | NA     | Modern cultivar | Southern-area group |
| G657 | Hangzhi2hao  | China | NA      | NA     | Modern cultivar | Southern-area group |
| G658 | Zhongzhi14   | China | NA      | NA     | Modern cultivar | Southern-area group |
| G659 | Zhongzhi17   | China | NA      | NA     | Modern cultivar | Southern-area group |
| G660 | Zhongzhi28   | China | NA      | NA     | Modern cultivar | Southern-area group |
| G661 | Zhongzhi3hao | China | NA      | NA     | Modern cultivar | Southern-area group |
| G662 | Zhongzhi5hao | China | 114.33E | 30.35N | Landrace        | Southern-area group |

|      |               |       |         |        |                 |                     |
|------|---------------|-------|---------|--------|-----------------|---------------------|
| G663 | Zhongzhi7hao  | China | NA      | NA     | Modern cultivar | Southern-area group |
| G664 | Zhongzhi8hao  | China | 114.33E | 30.35N | Landrace        | Southern-area group |
| G665 | Yuzhi11hao    | China | NA      | NA     | Modern cultivar | Southern-area group |
| G666 | Yuzhi14       | China | NA      | NA     | Modern cultivar | Southern-area group |
| G668 | Xin5hao       | China | NA      | NA     | Modern cultivar | Southern-area group |
| G669 | Yuzhi10hao    | China | NA      | NA     | Modern cultivar | Southern-area group |
| G670 | Yuzhi5hao     | China | NA      | NA     | Modern cultivar | Southern-area group |
| G671 | Yuzhi6hao     | China | NA      | NA     | Modern cultivar | Southern-area group |
| G672 | Yuzhi7hao     | China | NA      | NA     | Modern cultivar | Southern-area group |
| G673 | Zhengzhi04C85 | China | NA      | NA     | Modern cultivar | Southern-area group |
| G674 | Zhengzhi12hao | China | NA      | NA     | Modern cultivar | Southern-area group |
| G675 | Zhengzhi2010  | China | NA      | NA     | Modern cultivar | Southern-area group |
| G678 | Zhengzhi97C01 | China | NA      | NA     | Modern cultivar | Southern-area group |
| G680 | Luozhi15      | China | NA      | NA     | Modern cultivar | Southern-area group |
| G681 | Luozhi18hao   | China | NA      | NA     | Modern cultivar | Southern-area group |
| G682 | Luozhi19hao   | China | NA      | NA     | Modern cultivar | Southern-area group |
| G683 | Yuzhi15       | China | NA      | NA     | Modern cultivar | Southern-area group |
| G684 | Yuzhi2018     | China | NA      | NA     | Modern cultivar | Southern-area group |
| G685 | Zhuzhi14hao   | China | NA      | NA     | Modern cultivar | Southern-area group |
| G686 | Zhuzhi15hao   | China | NA      | NA     | Modern cultivar | Southern-area group |
| G687 | Zhuzhi16hao   | China | NA      | NA     | Modern cultivar | Southern-area group |
| G688 | Zhu0019       | China | NA      | NA     | Modern cultivar | Southern-area group |
| G689 | Wanzhi3hao    | China | NA      | NA     | Modern cultivar | Southern-area group |
| G691 | Xiongzhilhao  | China | NA      | NA     | Modern cultivar | Southern-area group |
| G692 | Ji951         | China | NA      | NA     | Modern cultivar | Northern-area group |
| G693 | Jihangzhilhao | China | NA      | NA     | Modern cultivar | Northern-area group |

|      |              |       |    |    |                 |                     |
|------|--------------|-------|----|----|-----------------|---------------------|
| G695 | Jizhi5hao    | China | NA | NA | Modern cultivar | Northern-area group |
| G696 | Jizhi6hao    | China | NA | NA | Modern cultivar | Northern-area group |
| G697 | Jingzhi1hao  | China | NA | NA | Modern cultivar | Southern-area group |
| G698 | Liaozhi2hao  | China | NA | NA | Modern cultivar | Southern-area group |
| G699 | Ningzhi1hao  | China | NA | NA | Modern cultivar | Southern-area group |
| G700 | Fenzhi2hao   | China | NA | NA | Modern cultivar | Southern-area group |
| G701 | Zhongzhi18   | China | NA | NA | Modern cultivar | Southern-area group |
| G702 | Zhongzhi19   | China | NA | NA | Modern cultivar | Southern-area group |
| G703 | Zhongzhi20   | China | NA | NA | Modern cultivar | Southern-area group |
| G704 | Zhuzhi20hao  | China | NA | NA | Modern cultivar | Southern-area group |
| G705 | Zhongzhi2771 | China | NA | NA | Modern cultivar | Southern-area group |
